# Supplementary material for: A synthetic human 3D in vitro lymphoid model enhancing B-cell survival and functional differentiation
Source: PubMed Central journal article supplement — iScience. 2022 Dec 5;26(1):105741. doi: 10.1016/j.isci.2022.105741 (PMC9794978; doi:10.1016/j.isci.2022.105741), 2022-12-05
Supplement: mmc1.pdf [file mmc1.pdf]

iScience, Volume 26

## **Supplemental information**

### **A synthetic human 3D *in vitro* lymphoid model enhancing B-cell survival and functional differentiation**

**Maaïke V.J. Braham, Rob S. van Binnendijk, Anne-Marie M. Buisman, Reina E. Mebius, Jelle de Wit, and Cécile A.C.M. van Els**

## Supplementary Figures

### A

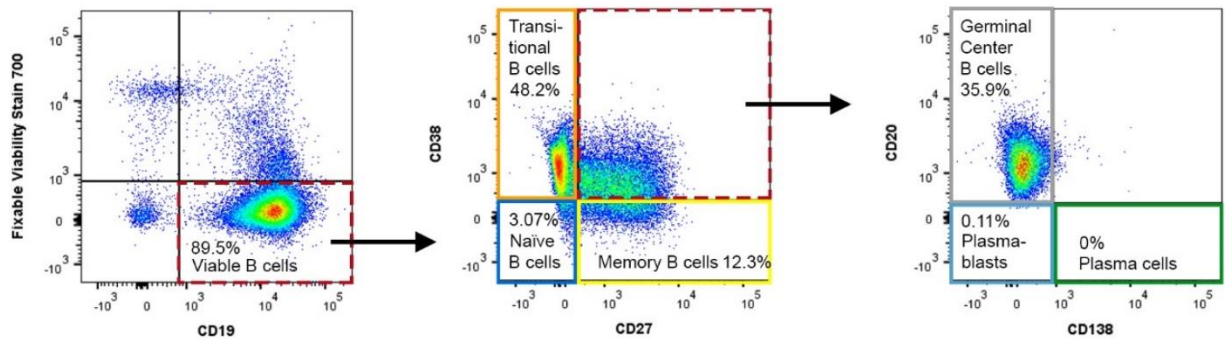

### B

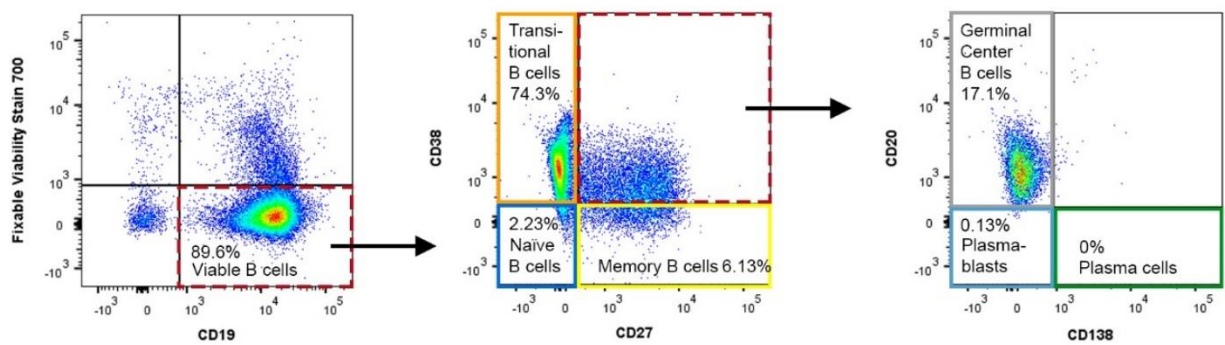

### C

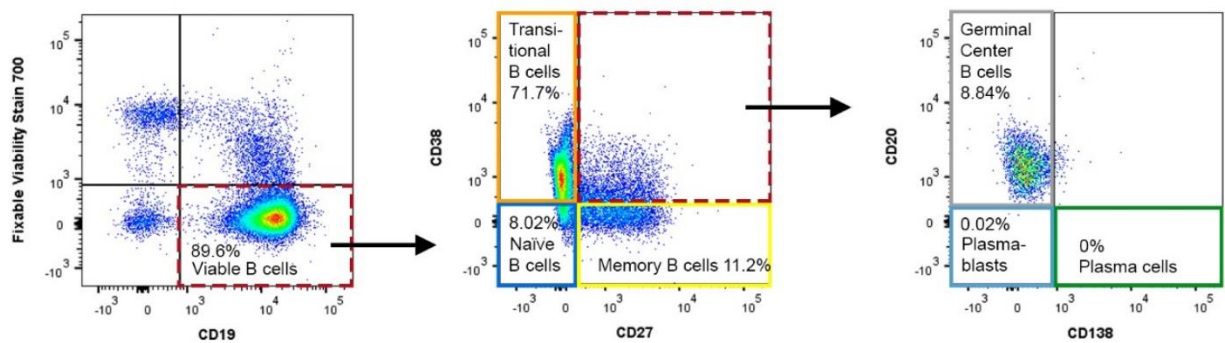

**Figure S1 Characterization of the input B cells after CD19 positive selection, Related to Figure 1.** Flowcytometry results of (A) Donor 1, (B) Donor 2, and (C) Donor 3 after CD19 positive selection, gating for viable fixable viability stain 700 negative, CD19<sup>+</sup> B-cells, naïve B-cells (CD19+CD20+CD27-CD38-CD138-), transitional B-cells (CD19+CD20+CD27-CD38+CD138-), germinal center B-cells (CD19+CD20+CD27+CD38+CD138-), memory B-cells (CD19+CD20+CD27+CD38-CD138-), plasmablasts (CD19+CD20-CD27+CD38+CD138-) and plasma cells (CD19+CD20-CD27+CD38+CD138+).

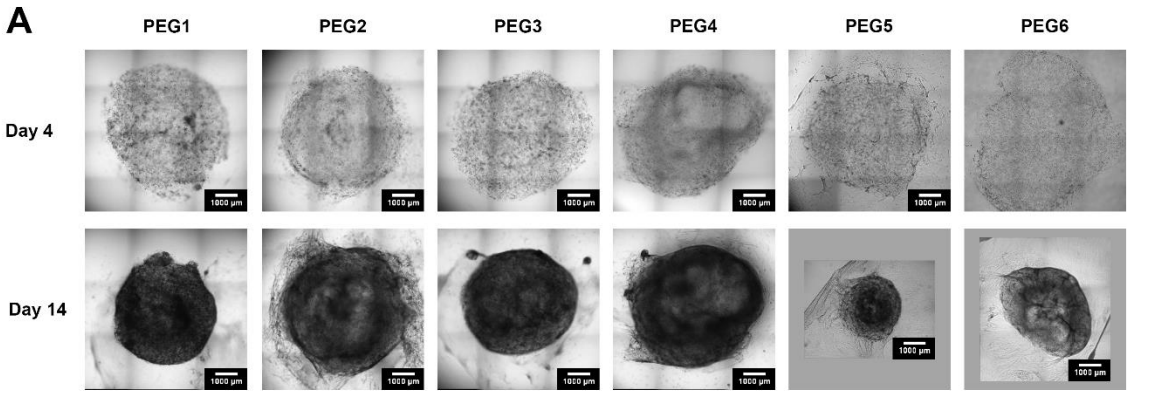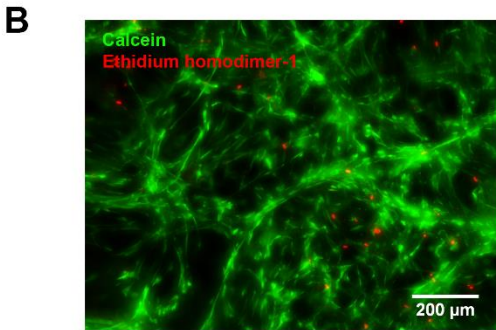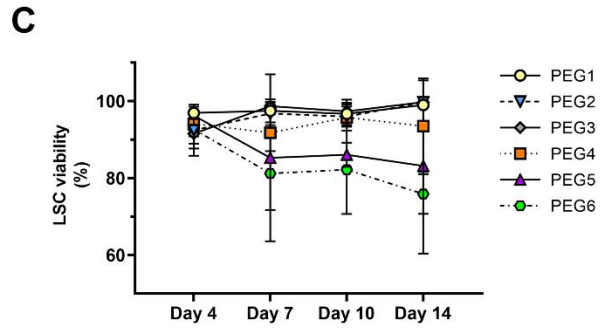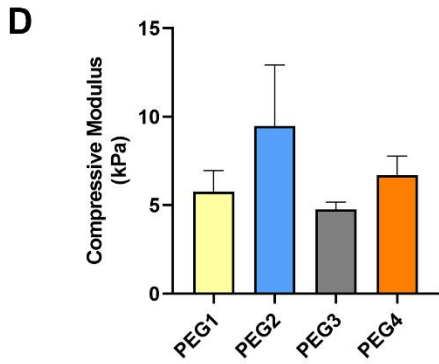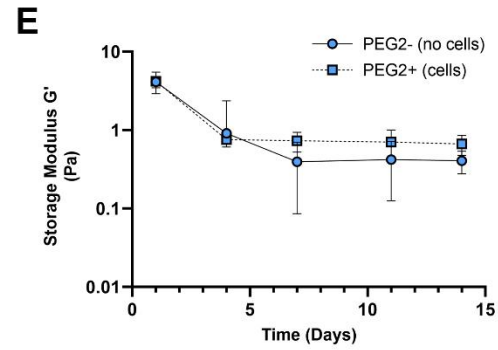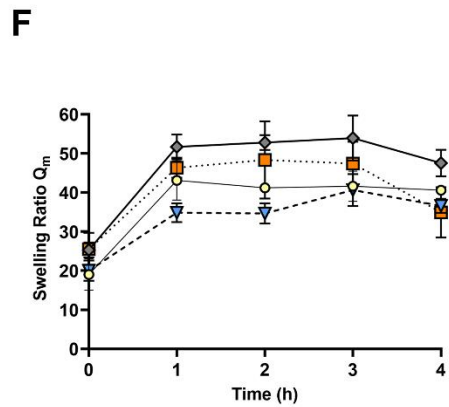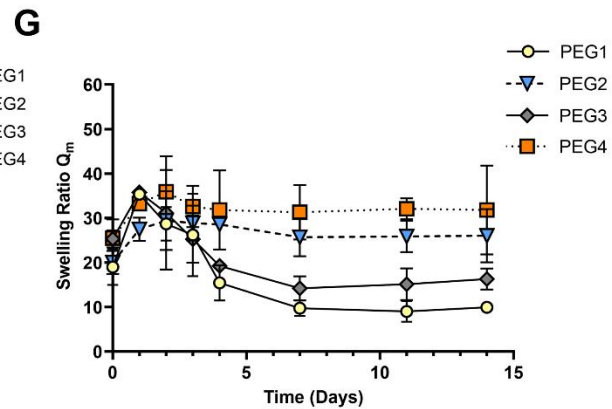

**Figure S2 Optimization of functionalized hydrogels for 3D *in vitro* B cell co-cultures, Related to Figure 3. PEG1:** 4% (w/v) PEG-4MAL, 2.0 mM RGD, 4.9 mM GPQ-W, **PEG2:** 5% (w/v) PEG-4MAL, 2.0 mM RGD, 6.6 mM GPQ-W,

**PEG3:** 4% (w/v) PEG-4MAL, 1.0 mM RGD, 1.0 mM REDV, 4.9 mM GPQ-W, **PEG4:** 5% (w/v) PEG-4MAL, 1.0 mM RGD, 1.0 mM REDV, 6.6 mM GPQ-W, **PEG5:** 4% (w/v) PEG-4MAL, 2.0 mM REDV, 4.9 mM GPQ-W, **PEG6:** 5% (w/v) PEG-4MAL, 2.0 mM REDV, 6.6 mM GPQ-W. **(A)** Brightfield images of 40  $\mu$ L crosslinked 3D co-cultures at day 4 and day 14. Scalebars present 1000  $\mu$ m. **(B)** Live/dead image of a PEG2 3D coculture at day 14 (green = calcein, staining living cells. Red = ethidium homodimer-1, staining dead cells). **(C)** Lymphoid stromal cell viability (n=3) over time in all 6 PEG conditions, measured using flowcytometry. **(D)** Compressive modulus (kPa) of PEG-4MAL gels (PEG1 – PEG4) without cells at day 1 **(E)** Storage modulus ( $G'$ ) of PEG2 over time, with and without cells, as an indirect measure of hydrogel degradation. Data shown was collected at 4 rad/s. **(F)** Swelling ratio ( $Q_m$ ) of PEG-4MAL gels (PEG1 – PEG4) without cells during the first hours after crosslinking and subsequent medium addition, **(G)** and during 14 days of culture. **(D-G)** Data showing the mean  $\pm$  SD (n=3).

**Table S1 Culture conditions (per well) of CD19<sup>+</sup> B cells co-cultured with CD40LCs and LSCs in either 2D or 3D, Related to Figure 4.**

| Culture components<br>(per well, 48 well plate) | 2D cultures            | 3D cultures                                              |
|-------------------------------------------------|------------------------|----------------------------------------------------------|
| CD19 <sup>+</sup> B cells                       | 5,000 cells            | 5,000 cells                                              |
| LSCs                                            | 12,500 cells           | 12,500 cells                                             |
| CD40LCs                                         | 12,500 cells           | 12,500 cells                                             |
| Hydrogel                                        | -                      | 20 $\mu$ L 5% (w/v) PEG-4MAL<br>2.0 mM RGD, 6.6 mM GPQ-W |
| Culture medium                                  | 250 $\mu$ L CK2 medium | 250 $\mu$ L CK2 medium                                   |
| 48 well plate                                   | Tissue culture treated | Non tissue culture treated                               |

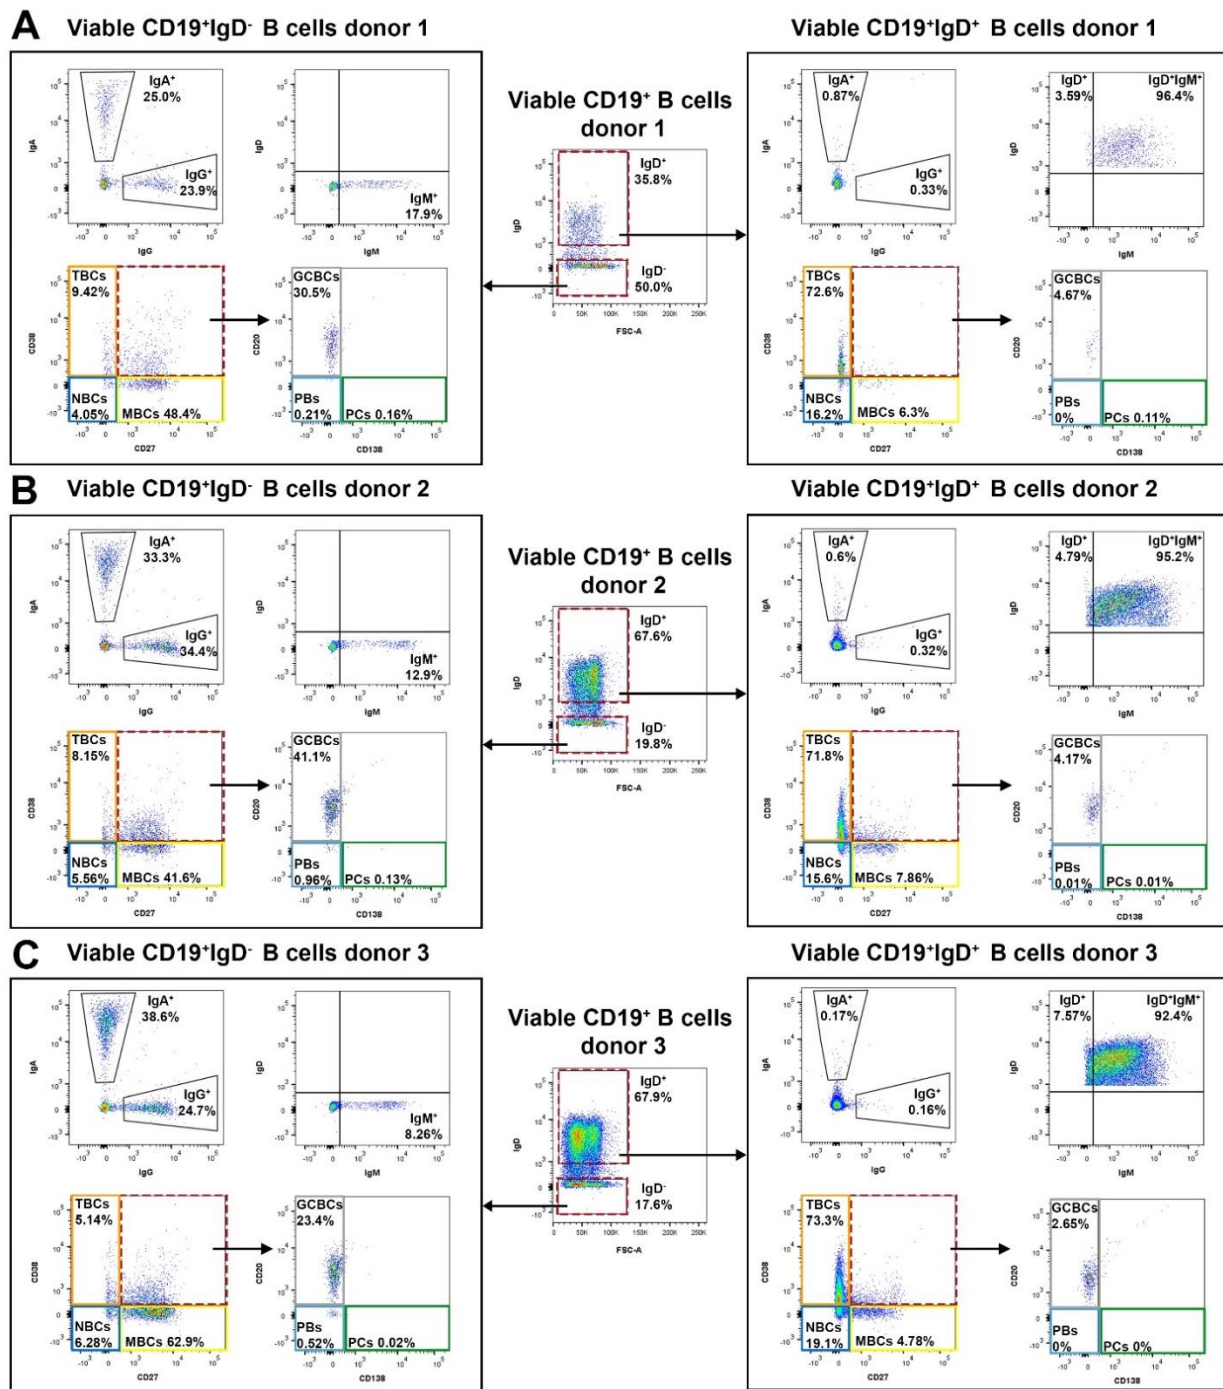

**Figure S3** Characterization of the input B cells after CD19 positive selection and subsequent CD19+IgD+7AAD- and CD19+IgD-7AAD- sorting, Related to Figure 5. Flowcytometry results of (A) Donor 1, (B) Donor 2, and (C) Donor 3 after the sorting of IgD<sup>+</sup> and IgD<sup>-</sup> populations. Each IgD FSC-A plot shows the set gates used for sorting. Subsequent flowcytometry results show the frequency of IgA<sup>+</sup>, IgG<sup>+</sup>, IgM<sup>+</sup>, IgD<sup>+</sup> and IgD<sup>+</sup>IgM<sup>+</sup> B cells and naïve B cells (NBCs), transitional B cells (TBCs), memory B cells (MBCs), germinal center B cells (GCBCs), plasmablasts (PBs) and plasma cells (PCs) within either the CD19<sup>+</sup>IgD<sup>+</sup>7AAD<sup>-</sup> or CD19<sup>+</sup>IgD<sup>-</sup>7AAD<sup>-</sup> population.

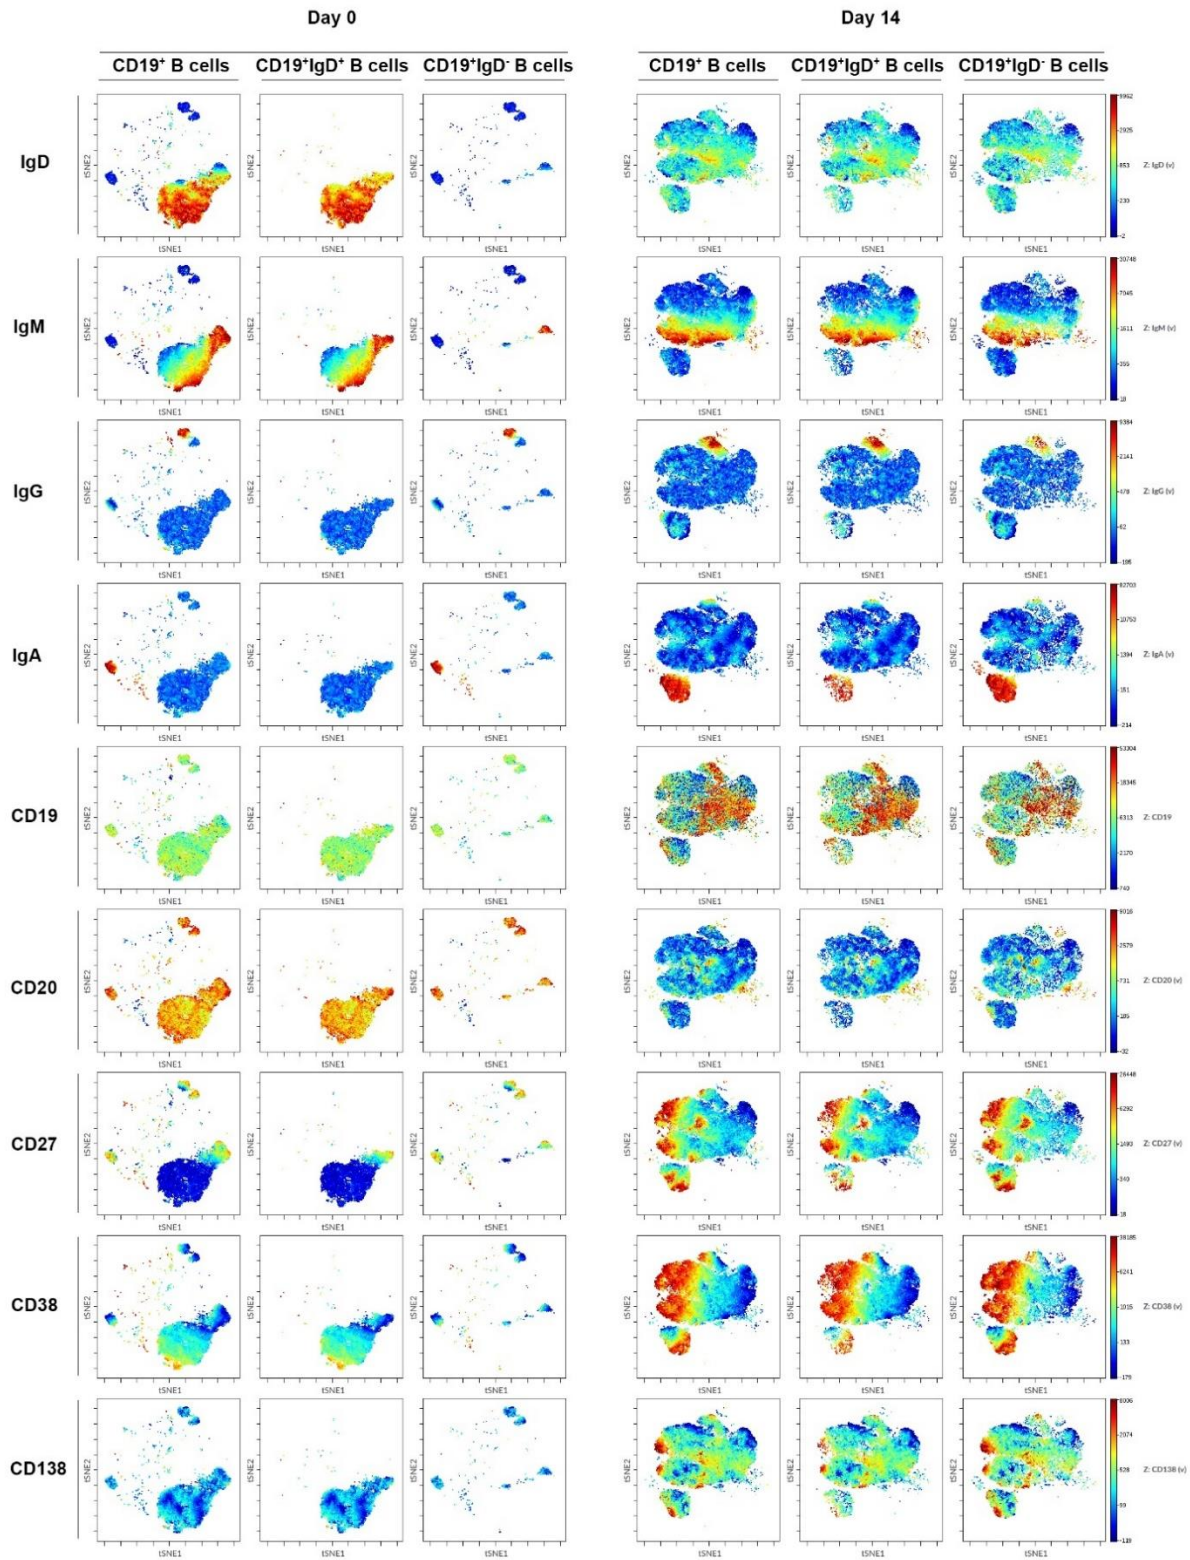

**Figure S4** Surface marker and membrane-bound immunoglobulin expression of total CD19<sup>+</sup> and sorted CD19<sup>+</sup>IgD<sup>+</sup> CD19<sup>+</sup>IgD<sup>-</sup> B cells, Related to Figure 5. viSNE dot plots of the concatenated (n=3) data at day 0 versus 14. Blue indicates low expression, yellow intermediate expression and red high expression.
